# Supplementary material
Source: PubMed Central journal article supplement (PMC10064284)
Supplement: jamaoncol-e230042-s003.pdf [file jamaoncol-e230042-s003.pdf]

## Supplemental Online Content

Wang D, Harris J, Kraybill WG, et al. Pathologic complete response and clinical outcomes in patients with localized soft tissue sarcoma treated with neoadjuvant chemoradiotherapy or radiotherapy : the NRG/RTOG 9514 and 0630 nonrandomized clinical trials. Published online March 30, 2023. *JAMA Oncol*. doi:10.1001/jamaoncol.2023.0042

**eFigure 1.** Flow Diagram

**eAppendix.** Report

**eTable 1.** Late Toxicities of Interest at 1-5 Years in RTOG 0630

**eTable 2.** Treatment-Related Late Adverse Events Occurring in At Least 5% of Patients in RTOG 0630 (n=75)

**eTable 3.** Comparison of Local and Central Review Histology

**eTable 4.** Comparison of Local and Central Review Histologic Grade

**eTable 5.** Comparison of Local and Central Review R Status

**eTable 6.** Alternative Multivariable Models for Overall Survival (n=112; 37 events)

**eTable 7.** Alternative Multivariable Models for Disease-Free Survival (n=112; 51 events)

**eTable 8.** Alternative Multivariable Models for Distant Disease-Free Survival (n=112; 47 events)

**eTable 9.** Alternative Multivariable Models for Distant Metastasis (n=112; 40 events)

This supplemental material has been provided by the authors to give readers additional information about their work.

**eFigure 1. Flow Diagram**

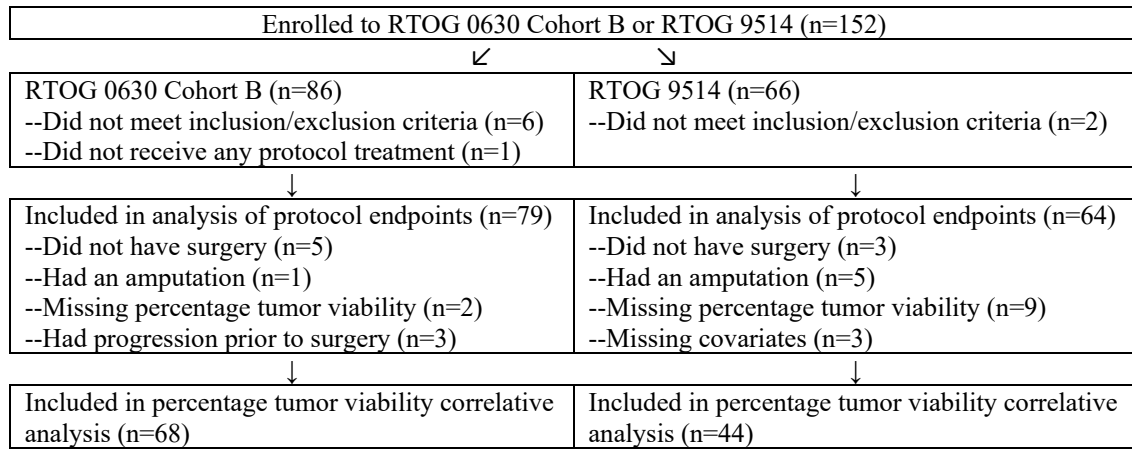

## eAppendix. Report

### Statistical Methodology

For the RTOG 0630 long-term update and ancillary project, rates of local, regional, and distant failure and second primary tumor were estimated by the cumulative incidence method, to account for the competing risk of death without failure. Rates of distant disease-free, disease-free, and overall survival (OS) were estimated by the Kaplan-Meier method. All event times were measured from the date of registration to RTOG 0630 to the date of event, competing event, or last follow-up. To allow comparison with the results of the CAN-NCIC-SR2 trial preoperative arm, the event-free proportions were estimated by the Kaplan-Meier method for local recurrence, regional/distant recurrence, and progression-free survival, after excluding patients that did not have surgery and those that had an amputation. For the ancillary project, Kappa statistics were calculated to evaluate the agreement of local and central review of histologic type, histologic grade, and R status; patients with unknown/unclassified values were excluded. For this part of the analysis only, survival and disease outcomes were recalculated from the date of surgery; patients that did not have surgery, had an amputation, or had progression prior to surgery were excluded. Hazard ratios were estimated by the Cox model, stratified by study. The final multivariable model was selected by minimizing Akaike Information Criterion (AIC). Alternative models with (1) AIC within 2 units of the smallest AIC for all candidate models and (2) replacing liposarcoma with myxoid/round cell liposarcoma (or vice versa) are also presented to evaluate the robustness of the post-treatment tumor viability effect on outcomes. Only patients with complete data for all potential covariates (age, gender, race, Zubrod performance status, disease location, disease size, histologic grade, time to surgery, R status, histologic type, and percentage tumor viability) were included in the analysis. When hazard ratios could not be estimated, the stratified log-rank test was used to assess differences in outcomes by tumor viability; for univariate analysis, the test was stratified by trial; and for multivariable, by trial and other variables in the model. Where central review data were available, they were used (100% for percentage tumor viability; 94% for histologic grade; 94% for histologic type; and 99% for R status); otherwise, local data were used.

**eTable 1. Late Toxicities of Interest at 1-5 Years in RTOG 0630**

| Toxicity                                                                            | Toxicity/Total | Toxicity (%) | 95% CI (%) |
|-------------------------------------------------------------------------------------|----------------|--------------|------------|
| <b>Grade 2+ subcutaneous tissue fibrosis [1], joint stiffness [1], or edema [2]</b> |                |              |            |
| 1 year                                                                              | 8/63           | 12.7         | 4.5, 20.9  |
| 2 years                                                                             | 6/57           | 10.5         | 2.6, 18.5  |
| 3 years                                                                             | 3/46           | 6.5          | 0.0, 13.7  |
| 4 years                                                                             | 3/39           | 7.7          | 0.0, 16.1  |
| 5 years                                                                             | 2/24           | 8.3          | 0.0, 19.4  |
| <b>Grade 2+ subcutaneous tissue fibrosis [1]</b>                                    |                |              |            |
| 1 year                                                                              | 1/64           | 1.6          | 0.0, 4.6   |
| 2 years                                                                             | 3/56           | 5.4          | 0.0, 11.3  |
| 3 years                                                                             | 0/46           | 0.0          | -          |
| 4 years                                                                             | 2/40           | 5.0          | 0.0, 11.8  |
| 5 years                                                                             | 1/24           | 4.2          | 0.0, 12.2  |
| <b>Grade 2+ joint stiffness [1]</b>                                                 |                |              |            |
| 1 year                                                                              | 5/63           | 7.9          | 1.3, 14.6  |
| 2 years                                                                             | 2/56           | 3.6          | 0.0, 8.4   |
| 3 years                                                                             | 1/46           | 2.2          | 0.0, 6.4   |
| 4 years                                                                             | 2/40           | 5.0          | 0.0, 11.8  |
| 5 years                                                                             | 1/24           | 4.2          | 0.0, 12.2  |
| <b>Grade 2+ edema [2]</b>                                                           |                |              |            |
| 1 year                                                                              | 3/66           | 4.5          | 0.0, 9.6   |
| 2 years                                                                             | 3/58           | 5.2          | 0.0, 10.9  |
| 3 years                                                                             | 2/46           | 4.3          | 0.0, 10.2  |
| 4 years                                                                             | 2/39           | 5.1          | 0.0, 12.1  |
| 5 years                                                                             | 1/24           | 4.2          | 0.0, 12.2  |

CI, confidence interval.

[1] RTOG/EORTC criteria.

[2] Stern's scale.

All time points are measured from the start of radiation therapy and include a window of +/- 3 months.

**eTable 2. Treatment-Related Late Adverse Events Occurring in At Least 5% of Patients in RTOG 0630 (n=75)**

| Adverse Event                                  | Grade |    |    |   | Grade 1-4 (%) | Grade 2-4 (%) |
|------------------------------------------------|-------|----|----|---|---------------|---------------|
|                                                | 1     | 2  | 3  | 4 |               |               |
| Any                                            | 28    | 28 | 10 | 1 | 89.3          | 52.0          |
| Edema limbs                                    | 27    | 11 | 3  | 0 | 54.7          | 18.7          |
| Skin induration                                | 22    | 7  | 1  | 0 | 40.0          | 10.7          |
| Joint disorder                                 | 12    | 9  | 1  | 0 | 29.3          | 13.3          |
| Pain in extremity                              | 9     | 8  | 0  | 0 | 22.7          | 10.7          |
| Peripheral sensory neuropathy                  | 11    | 1  | 0  | 0 | 16.0          | 1.3           |
| Seroma                                         | 7     | 0  | 2  | 0 | 12.0          | 2.7           |
| Pain [other]                                   | 4     | 3  | 1  | 0 | 10.7          | 5.3           |
| Musculoskeletal disorder                       | 4     | 1  | 0  | 0 | 6.7           | 1.3           |
| Fatigue                                        | 0     | 2  | 2  | 0 | 5.3           | 5.3           |
| Wound infection [with normal or Grade 1-2 ANC] | 0     | 2  | 2  | 0 | 5.3           | 5.3           |
| Fracture                                       | 1     | 2  | 0  | 1 | 5.3           | 4.0           |
| Skin disorder                                  | 2     | 2  | 0  | 0 | 5.3           | 2.7           |
| Gait abnormal                                  | 4     | 0  | 0  | 0 | 5.3           | 0.0           |
| Joint pain                                     | 4     | 0  | 0  | 0 | 5.3           | 0.0           |
| Skin hyperpigmentation                         | 4     | 0  | 0  | 0 | 5.3           | 0.0           |

Adverse events were graded by Common Terminology Criteria for Adverse Events, version 3.0.

Treatment-related: definitely, probably, or possibly related to protocol treatment (or with unknown relationship).

Late: >6 months after start of radiation therapy.

**eTable 3. Comparison of Local and Central Review Histology**

| Local         | Central Review |                   |      |      |                  |       |         |      |                     |      |     |     | Total |
|---------------|----------------|-------------------|------|------|------------------|-------|---------|------|---------------------|------|-----|-----|-------|
|               | Epi            | ES<br>Mxy<br>Chon | Leio | Lipo | LG<br>Fib<br>Myx | MPNST | Myxofib | Rhab | Scler<br>Epi<br>Fib | Syno | UPS | USC |       |
| Epi           | 1              | 0                 | 0    | 0    | 0                | 0     | 0       | 0    | 0                   | 0    | 0   | 0   | 1     |
| ES Myx Con    | 0              | 1                 | 0    | 0    | 0                | 0     | 0       | 0    | 0                   | 0    | 0   | 0   | 1     |
| Leio          | 0              | 0                 | 10   | 0    | 0                | 0     | 0       | 1    | 0                   | 0    | 3   | 1   | 15    |
| Lipo          | 0              | 0                 | 2    | 23   | 0                | 0     | 3       | 0    | 0                   | 0    | 6   | 0   | 34    |
| LG Fib Myx    | 0              | 0                 | 0    | 0    | 0                | 0     | 0       | 0    | 0                   | 0    | 0   | 0   | 0     |
| MPNST         | 0              | 0                 | 0    | 0    | 0                | 1     | 0       | 0    | 0                   | 0    | 0   | 0   | 1     |
| Myxofib       | 0              | 0                 | 0    | 0    | 0                | 0     | 1       | 0    | 0                   | 0    | 0   | 0   | 1     |
| Rhab          | 0              | 0                 | 0    | 0    | 0                | 0     | 0       | 0    | 0                   | 0    | 0   | 0   | 0     |
| Scler Epi Fib | 0              | 0                 | 0    | 0    | 0                | 0     | 0       | 0    | 0                   | 0    | 0   | 0   | 0     |
| Syno          | 0              | 0                 | 0    | 0    | 0                | 1     | 0       | 0    | 0                   | 5    | 0   | 0   | 6     |
| UPS           | 0              | 0                 | 2    | 0    | 0                | 0     | 6       | 0    | 0                   | 0    | 23  | 0   | 31    |
| USC           | 0              | 0                 | 0    | 0    | 1                | 2     | 10      | 0    | 1                   | 2    | 7   | 5   | 28    |
| Total         | 1              | 1                 | 14   | 23   | 1                | 4     | 20      | 1    | 1                   | 7    | 39  | 6   | 118   |

Epi, epithelioid sarcoma

ES Myx Con, extraskeletal myxoid condrosarcoma

Leio, leiomyosarcoma

Lipo, liposarcoma

LG Fib Myx, low grade fibromyxoid

MPNST, malignant peripheral nerve sheath tumor

Myxofib, myxofibrosarcoma

Rhab, rhabdomyosarcoma

Scler Epi Fib, sclerosing epithelioid fibrosarcoma

Syno, synovial sarcoma

UPS, undifferentiated pleomorphic sarcoma

USC, undifferentiated spindle cell sarcoma

Kappa statistic: 0.51 (95% confidence interval 0.41-0.61)

**eTable 4. Comparison of Local and Central Review Histologic Grade**

| Local | Central Review |    |    |       |
|-------|----------------|----|----|-------|
|       | G1             | G2 | G3 | Total |
| G1    | 10             | 13 | 2  | 25    |
| G2    | 3              | 15 | 20 | 38    |
| G3    | 0              | 4  | 61 | 65    |
| Total | 13             | 32 | 83 | 128   |

Kappa statistic: 0.43 (95% confidence interval 0.31-0.56)



**eTable 5. Comparison of Local and Central Review R Status**

| Local | Central Review |    |    |       |
|-------|----------------|----|----|-------|
|       | R0             | R1 | R2 | Total |
| R0    | 107            | 1  | 0  | 108   |
| R1    | 3              | 18 | 0  | 21    |
| R2    | 1              | 1  | 0  | 2     |
| Total | 111            | 20 | 0  | 131   |

Kappa statistic: 0.83 (95% confidence interval 0.71-0.96)

**Table 6. Alternative Multivariable Models for Overall Survival (n=112; 37 events)**

| Variable                                                 | Minimum AIC Model<br>HR (95% CI);<br>p-value | Alternative Model #1<br>HR (95% CI);<br>p-value | Alternative Model #2<br>HR (95% CI);<br>p-value | Alternative Model #3<br>HR (95% CI);<br>p-value |
|----------------------------------------------------------|----------------------------------------------|-------------------------------------------------|-------------------------------------------------|-------------------------------------------------|
| Location (upper/other vs. lower extremity)               | --                                           | 1.92 (0.94-3.92);<br>p=0.07                     | --                                              | --                                              |
| Size, cm (> 20 vs. ≤ 20)                                 | 2.51 (1.12-5.59);<br>p=0.03                  | 2.32 (1.04-5.17);<br>p=0.04                     | 2.14 (0.96-4.76);<br>p=0.06                     | 2.17 (0.96-4.89);<br>p=0.06                     |
| Grade (2-3 vs. 1)                                        | 3.49 (0.80-15.30);<br>p=0.10                 | --                                              | --                                              | 4.29 (0.97-19.05);<br>p=0.06                    |
| Histology (others vs. leio or lipo or myxofib)           | 2.24 (1.12-4.45);<br>p=0.02                  | 2.45 (1.22-4.91);<br>p=0.01                     | 2.46 (1.22-4.94);<br>p=0.01                     | --                                              |
| Histology (others vs. leio or myxoid/rc lipo or myxofib) | --                                           | --                                              | --                                              | 2.01 (1.00-4.03);<br>p=0.05                     |
| Tumor viability (>0% vs. 0%) [1]                         | Cannot estimate;<br>p=0.01                   | Cannot estimate;<br>p=0.005                     | Cannot estimate;<br>p=0.004                     | Cannot estimate;<br>p=0.01                      |
| AIC                                                      | 261.771                                      | 262.570                                         | 263.542                                         | 263.166                                         |

HR, hazard ratio; CI, confidence interval; leio, leiomyosarcoma; lipo, liposarcoma; myxofib, myxofibrosarcoma; rc, round cell; AIC, Akaike Information Criterion.

[1] There are no events in the 0% tumor viability group so the hazard ratio and p-value cannot be estimated by the Cox model. The p-value comes from the log-rank test stratified by study and the covariates in that model.

All tumor viability data, 94% of grade data, and 94% of histology data were based on central review; all other data were from the treating institution.

**Table 7. Alternative Multivariable Models for Disease-Free Survival (n=112; 51 events)**

| Variable                                         | Minimum AIC Model<br>HR (95% CI);<br>p-value | Alternative Model #1<br>HR (95% CI);<br>p-value | Alternative Model #2<br>HR (95% CI);<br>p-value | Alternative Model #3<br>HR (95% CI);<br>p-value |
|--------------------------------------------------|----------------------------------------------|-------------------------------------------------|-------------------------------------------------|-------------------------------------------------|
| Zubrod PS (1 vs. 0)                              | 1.64 (0.87-3.10);<br>p=0.13                  | --                                              | 1.56 (0.82-2.97);<br>p=0.17                     | 1.82 (0.97-3.41);<br>p=0.06                     |
| Location (other vs. lower/upper extremity)       | 1.93 (0.85-4.40);<br>p=0.12                  | 1.87 (0.83-4.23);<br>p=0.13                     | --                                              | 1.79 (0.79-4.07);<br>p=0.17                     |
| Size, cm (> 16 vs. ≤ 16)                         | 2.63 (1.42-4.88);<br>p=0.002                 | 2.81 (1.50-5.26);<br>p=0.001                    | 2.43 (1.34-4.41);<br>p=0.004                    | 2.23 (1.22-4.09);<br>p=0.009                    |
| Grade (2-3 vs. 1)                                | --                                           | 1.80 (0.66-4.89);<br>p=0.25                     | 1.71 (0.62-4.69);<br>p=0.30                     | --                                              |
| Histology (others vs. lipo or myxofib)           | 2.42 (1.23-4.76);<br>p=0.01                  | 2.45 (1.25-4.79);<br>p=0.009                    | 2.20 (1.10-4.37);<br>p=0.03                     | --                                              |
| Histology (others vs. myxoid/rc lipo or myxofib) | --                                           | --                                              | --                                              | 1.91 (0.95-3.87);<br>p=0.07                     |
| Tumor viability (>0% vs. 0%)                     | 4.91 (1.51-15.93);<br>p=0.008                | 4.42 (1.36-14.32);<br>p=0.01                    | 4.79 (1.47-15.59);<br>p=0.009                   | 4.94 (1.52-16.07);<br>p=0.008                   |
| AIC                                              | 362.014                                      | 362.742                                         | 363.032                                         | 365.422                                         |

HR, hazard ratio; CI, confidence interval; PS, performance status; lipo, liposarcoma; myxofib, myxofibrosarcoma; rc, round cell; AIC, Akaike Information Criterion.

All tumor viability data, 94% of grade data, and 94% of histology data were based on central review; all other data were from the treating institution.

**Table 8. Alternative Multivariable Models for Distant Disease-Free Survival****(n=112; 47 events)**

| Variable                                                 | Minimum AIC                  | Alternative                  | Alternative                   | Alternative                  |
|----------------------------------------------------------|------------------------------|------------------------------|-------------------------------|------------------------------|
|                                                          | Model                        | Model #1                     | Model #2                      | Model #3                     |
|                                                          | HR (95% CI);                 | HR (95% CI);                 | HR (95% CI);                  | HR (95% CI);                 |
|                                                          | p-value                      | p-value                      | p-value                       | p-value                      |
| Zubrod PS (1 vs. 0)                                      | 2.02 (1.06-3.87);<br>p=0.03  | 2.03 (1.05-3.93);<br>p=0.04  | 2.41 (1.29-4.52);<br>p=0.006  | 2.19 (1.15-4.17);<br>p=0.02  |
| Location (other vs. lower/upper extremity)               | 2.15 (0.94-4.91);<br>p=0.07  | --                           | 2.10 (0.92-4.81);<br>p=0.08   | 2.04 (0.89-4.66);<br>p=0.09  |
| Size, cm (> 16 vs. ≤ 16)                                 | 2.78 (1.49-5.18);<br>p=0.001 | 2.46 (1.35-4.49);<br>p=0.003 | 2.60 (1.40-4.85);<br>p=0.003  | 2.55 (1.37-4.74);<br>p=0.003 |
| Histology (others vs. leio or lipo or myxofib)           | 1.78 (0.94-3.38);<br>p=0.08  | 1.77 (0.92-3.39);<br>p=0.09  | --                            | --                           |
| Histology (others vs. leio or myxoid/rc lipo or myxofib) | --                           | --                           | --                            | 1.45 (0.77-2.74);<br>p=0.25  |
| Tumor viability (>0% vs. 0%)                             | 4.33 (1.32-14.14);<br>p=0.02 | 4.55 (1.39-14.87);<br>p=0.01 | 4.97 (1.53-16.11);<br>p=0.008 | 4.45 (1.35-14.61);<br>p=0.01 |
| AIC                                                      | 336.863                      | 337.778                      | 338.040                       | 338.680                      |

HR, hazard ratio; CI, confidence interval; PS, performance status; leio, leiomyosarcoma; lipo, liposarcoma; myxofib, myxofibrosarcoma; rc, round cell; AIC, Akaike Information Criterion.

All tumor viability data and 94% of histology data were based on central review; all other data were from the treating institution.

**eTable 9. Alternative Multivariable Models for Distant Metastasis (n=112; 40 events)**

| Variable                                         | Minimum AIC Model<br>HR (95% CI);<br>p-value | Alternative Model #1<br>HR (95% CI);<br>p-value | Alternative Model #2<br>HR (95% CI);<br>p-value | Alternative Model #3<br>HR (95% CI);<br>p-value |
|--------------------------------------------------|----------------------------------------------|-------------------------------------------------|-------------------------------------------------|-------------------------------------------------|
| Zubrod PS (1 vs. 0)                              | 2.45 (1.25-4.82);<br>p=0.009                 | 2.28 (1.15-4.52);<br>p=0.02                     | 2.28 (1.14-4.56);<br>p=0.02                     | 2.15 (1.06-4.36);<br>p=0.03                     |
| Location (other vs. lower/upper extremity)       | 2.25 (0.92-5.49);<br>p=0.08                  | --                                              | --                                              | --                                              |
| Size, cm (> 16 vs. ≤ 16)                         | 2.74 (1.40-5.33);<br>p=0.003                 | 2.56 (1.34-4.90);<br>p=0.005                    | 2.40 (1.27-4.53);<br>p=0.007                    | 2.57 (1.34-4.91);<br>p=0.004                    |
| Grade (2-3 vs. 1)                                | --                                           | 1.91 (0.63-5.77);<br>p=0.25                     | --                                              | --                                              |
| Histology (others vs. lipo or myxofib)           | --                                           | --                                              | --                                              | 1.63 (0.78-3.38);<br>p=0.19                     |
| Histology (others vs. myxoid/rc lipo or myxofib) | --                                           | --                                              | 1.47 (0.69-3.13);<br>p=0.31                     | --                                              |
| Tumor viability (>0% vs. 0%)                     | 4.09 (1.25-13.36);<br>p=0.02                 | 3.92 (1.19-12.93);<br>p=0.02                    | 3.98 (1.21-13.16);<br>p=0.02                    | 3.99 (1.21-13.12);<br>p=0.02                    |
| AIC                                              | 293.219                                      | 294.515                                         | 294.924                                         | 294.243                                         |

HR, hazard ratio; CI, confidence interval; PS, performance status; lipo, liposarcoma; myxofib, myxofibrosarcoma; rc, round cell; AIC, Akaike Information Criterion.

All tumor viability data, 94% of grade data, and 94% of histology data were based on central review; all other data were from the treating institution.
