# Supplementary material
Source: PubMed Central journal article supplement (PMC10064284)
Supplement: jamaoncol-e230042-s004.pdf [file jamaoncol-e230042-s004.pdf]

## Data Sharing Statement

Wang. Pathologic Complete Response and Clinical Outcomes in Patients With Localized Soft Tissue Sarcoma Treated With Neoadjuvant Chemoradiotherapy or Radiotherapy. *JAMA Oncol.* Published March 30, 2023. doi:10.1001/jamaoncol.2023.0042

### Data

**Data available:** Yes

**Data types:** Deidentified participant data

**How to access data:** Data will be made available per the NCTN Data Archiving Rules-<https://nctn-data-archive.nci.nih.gov/>

**When available:** beginning date: 11-10-2022

### Supporting Documents

**Document types:** None

### Additional Information

**Who can access the data:** Per NCTN Data Archive Rules

**Types of analyses:** Per NCTN Data Archive Rules

**Mechanisms of data availability:** Per NCTN Data Archive Rules

**Any additional restrictions:** Per NCTN Data Archive Rules
